# Supplementary material for: Thymidine kinase 1 concentration and activity in metastatic breast cancer under CDK4/6 inhibitor therapy
Source: Springer Nature journal article supplement (doi:10.1038/s41598-025-95114-7), 2025-03-25
Supplement: MOESM1 [file 41598_2025_95114_MOESM1_ESM.pdf]

## **Supplementary Material including Sup Figures, Tables and Files**

For the manuscript: *Thymidine kinase 1 concentration and activity in metastatic breast cancer under CDK4/6 inhibitor therapy*

*By Stefanos Ioannis Moukas, Merle Dohn, Catrin Lehnerdt, Anja Welt, Hans-Christian Kolberg, Oliver Hoffmann, Rainer Kimmig, Sabine Kasimir-Bauer, Corinna Keup*

Sup Figure 1-7

Sup Table 1-3

Sup File 1

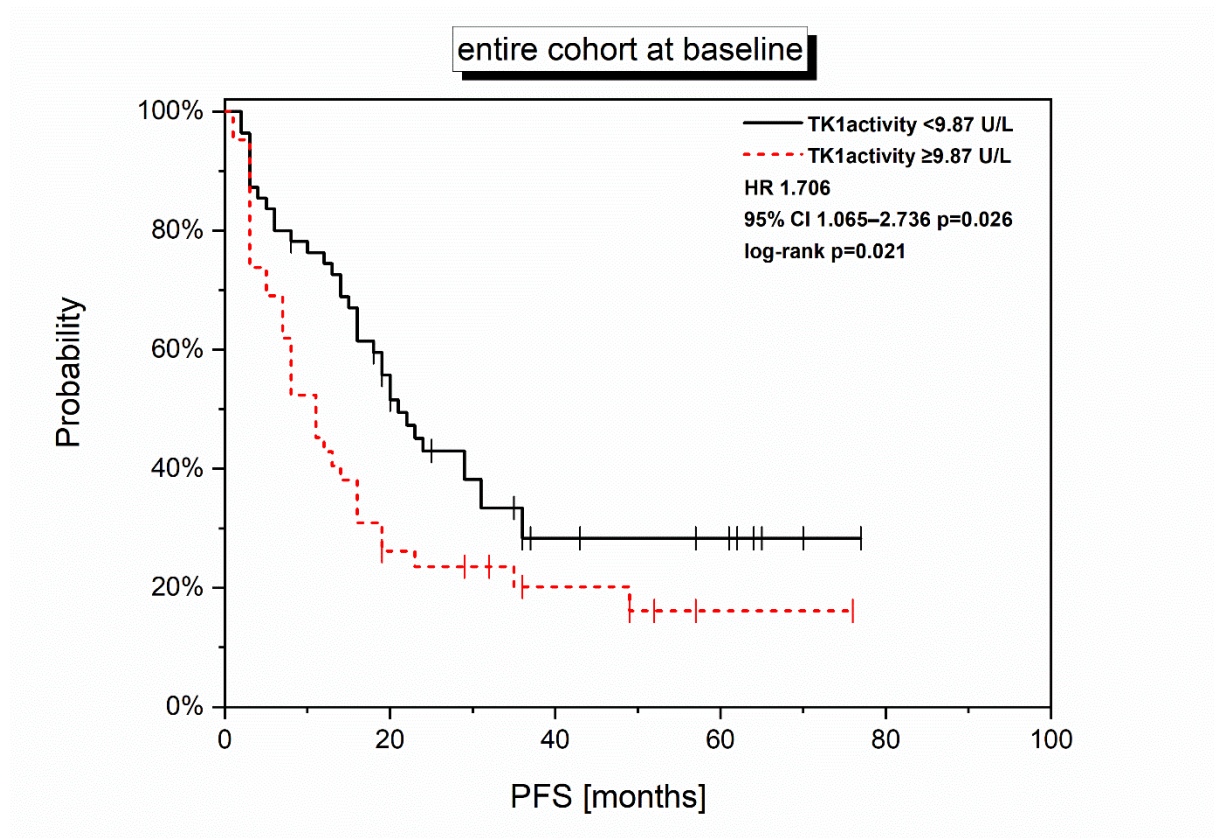

**Sup Figure 1: TK1 activity at baseline in relation to PFS in the entire cohort.** High TK1 activity at baseline (Cut-off: 9.87U/L) significantly correlated with PFS in the entire cohort in the log-rank analysis.

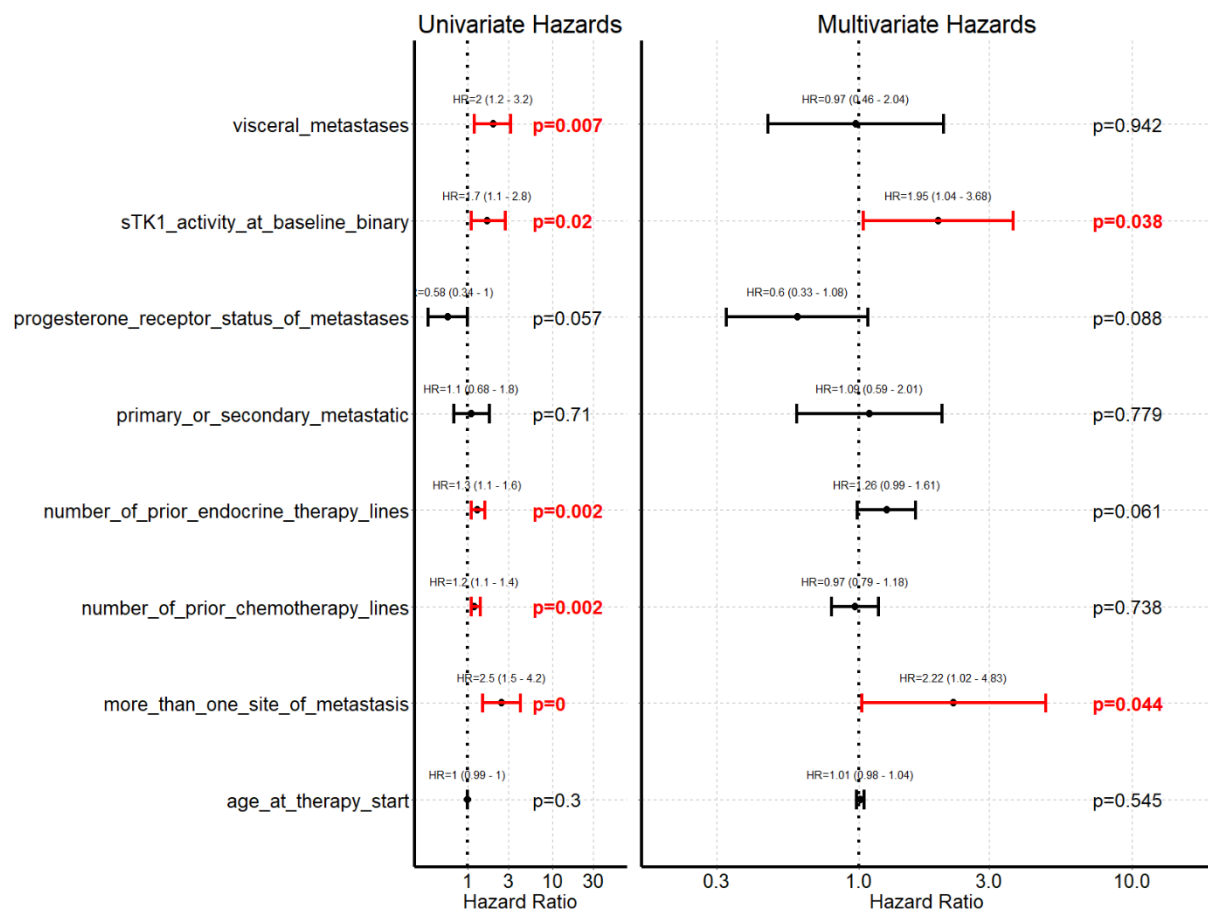

**Sup Figure 2: TK1 activity at baseline in relation to PFS in the entire cohort.** High TK1 activity at baseline (Cut-off: 9.87U/L) significantly correlated with PFS in the entire cohort in the univariate and multivariate Cox regression analysis.

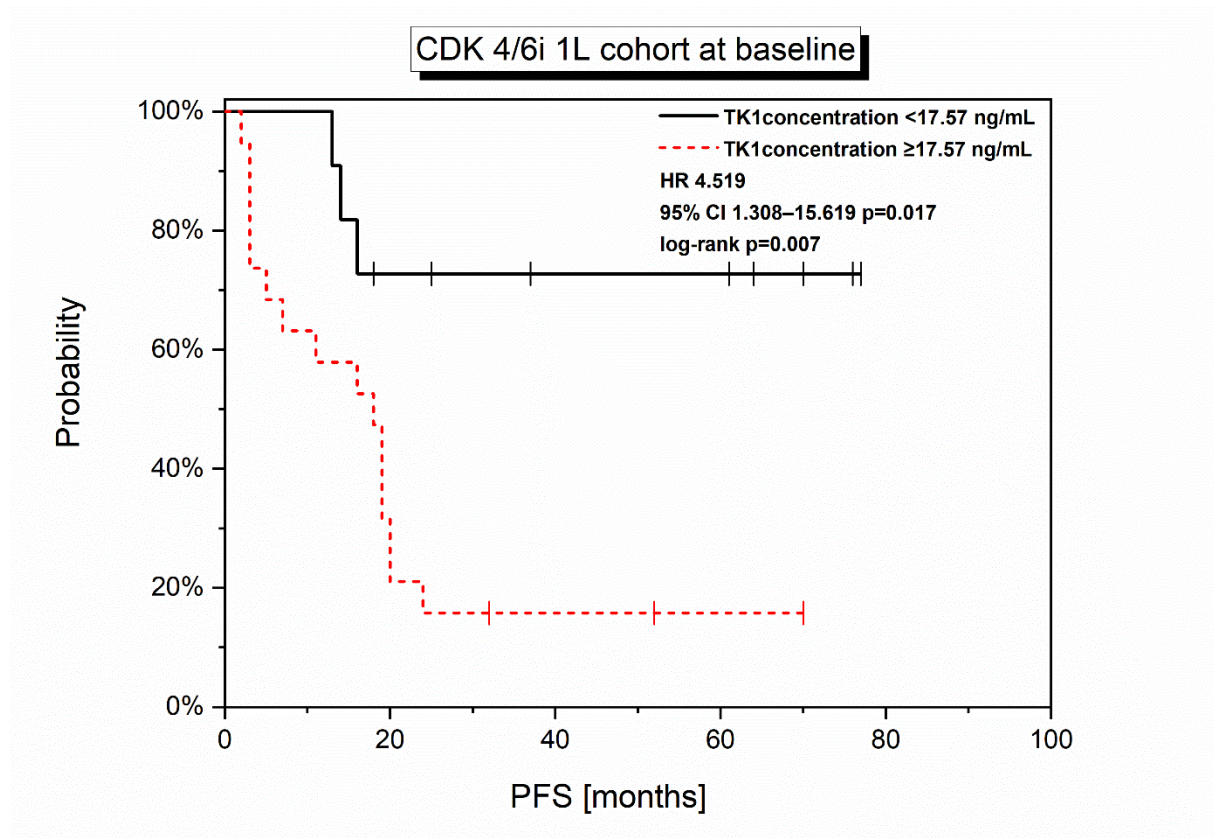

**Sup Figure 3: TK1 concentration at baseline in relation to PFS in the CDK4/6i 1L cohort.** High TK1 concentration at baseline (Cut-off: 17.57ng/mL) significantly correlated with PFS in the CDK4/6i 1L cohort in the log-rank analysis.

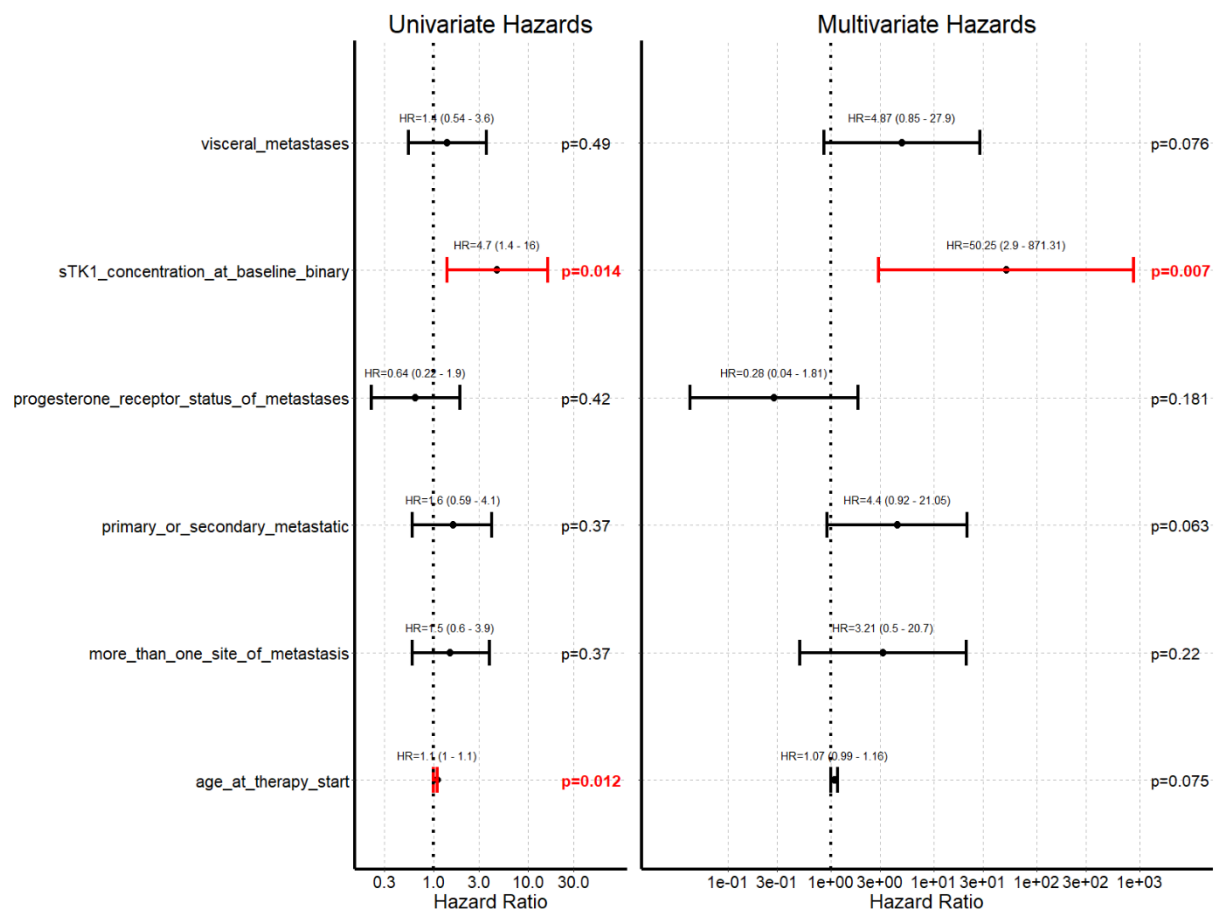

**Sup Figure 4: TK1 concentration at baseline in relation to PFS in the CDK4/6i 1L cohort.** High TK1 concentration at baseline (Cut-off: 17.57ng/mL) significantly correlated with PFS in the CDK4/6i 1L cohort in the univariate and multivariate Cox regression analysis.

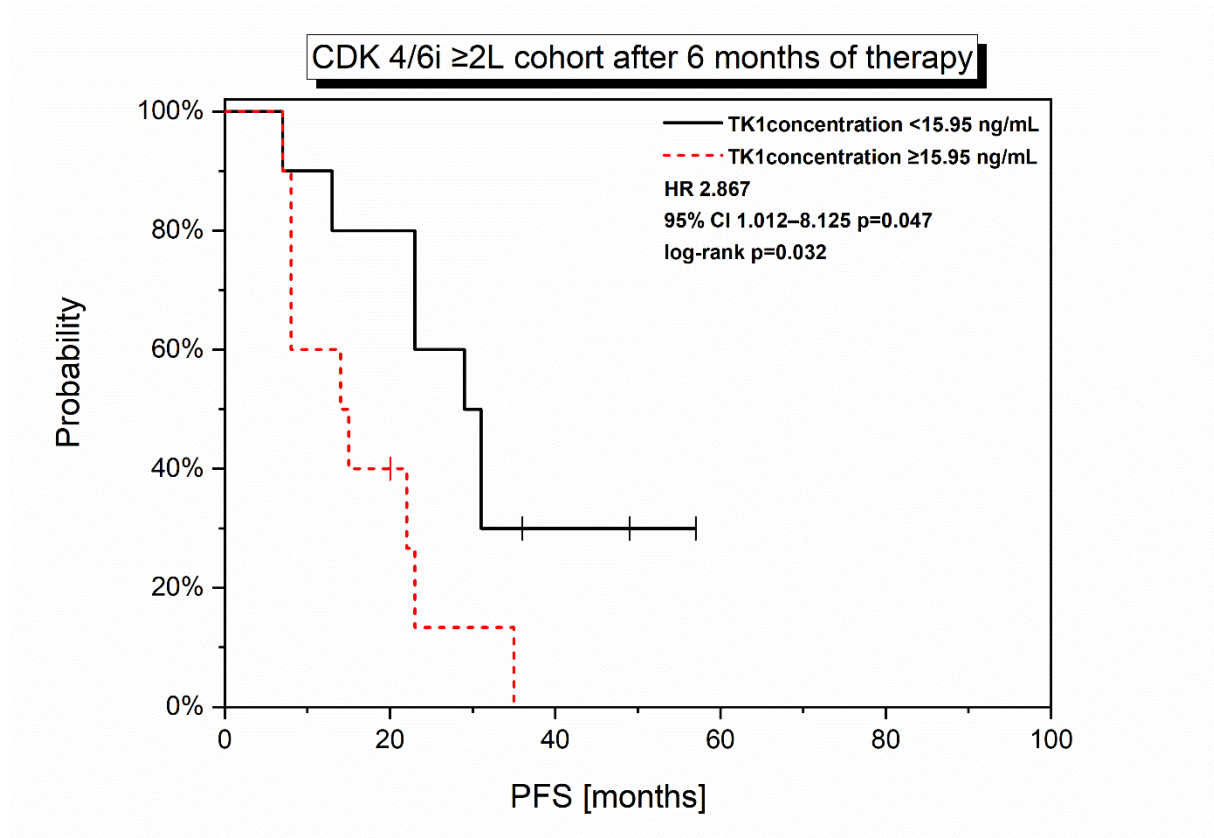

**Sup Figure 5: TK1 concentration after six months of therapy in relation to PFS in the CDK4/6i  $>2L$  cohort.** High TK1 concentration after six months of therapy (Cut-off: 15.95ng/mL) significantly correlated with PFS in the CDK4/6i  $>2L$  cohort in the log-rank analysis.

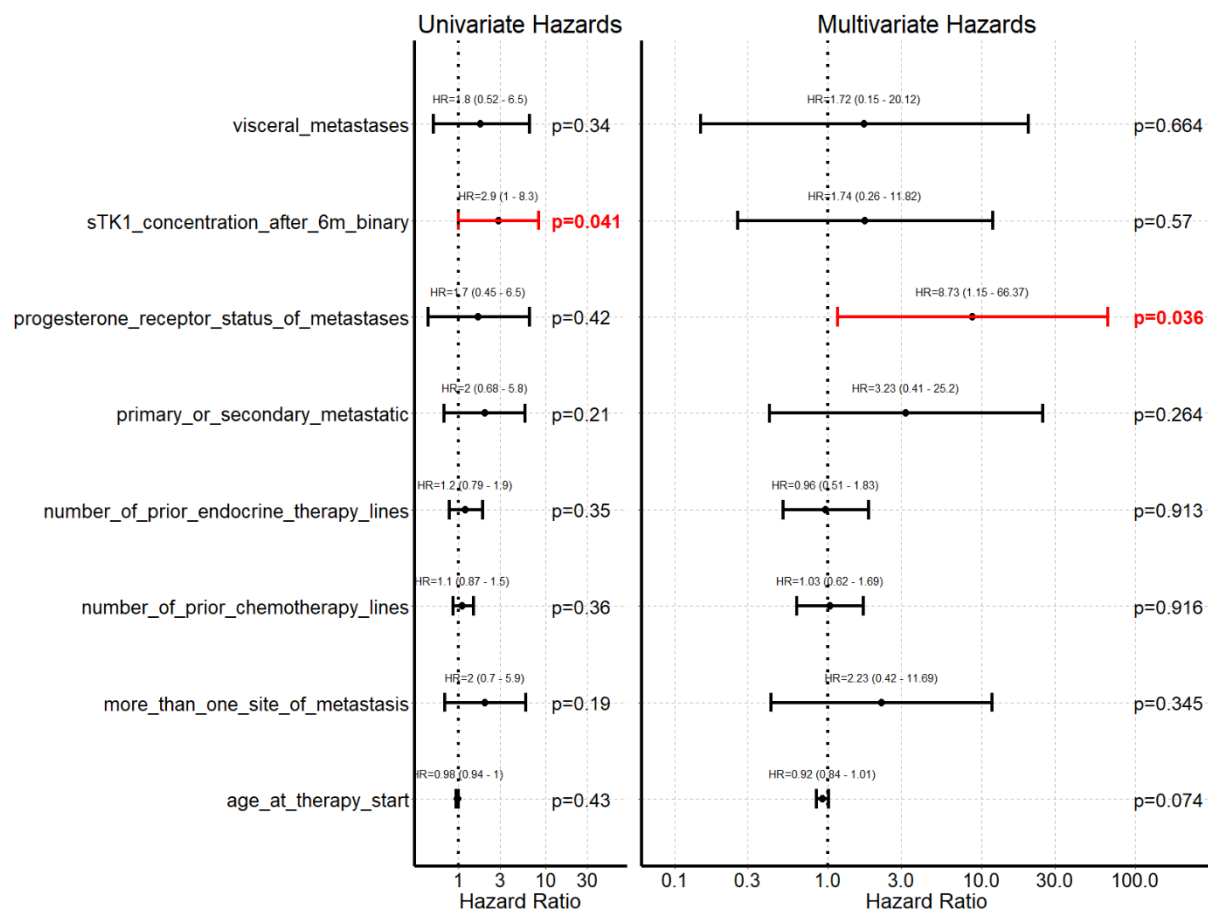

**Sup Figure 6: TK1 concentration after six months of therapy in relation to PFS in the CDK4/6i >2L cohort.** High TK1 concentration after six months of therapy (Cut-off: 15.95ng/mL) significantly correlated with PFS in the CDK4/6i >2L cohort in the univariate, but not in the multivariate Cox regression analysis.



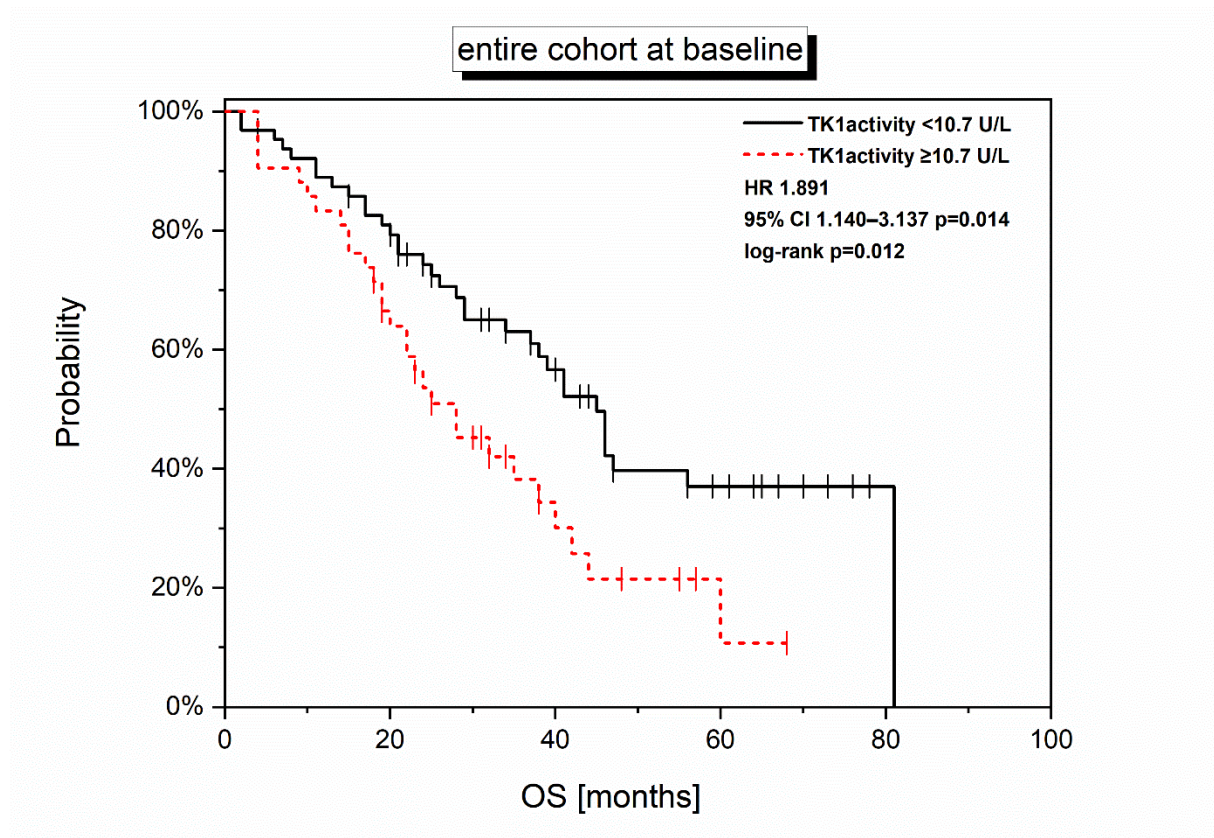

**Sup Figure 7: TK1 activity at baseline in relation to OS in the entire cohort.** High TK1 activity at baseline (Cut-off: 10.7U/L) significantly correlated with OS in the entire cohort in the log-rank analysis.



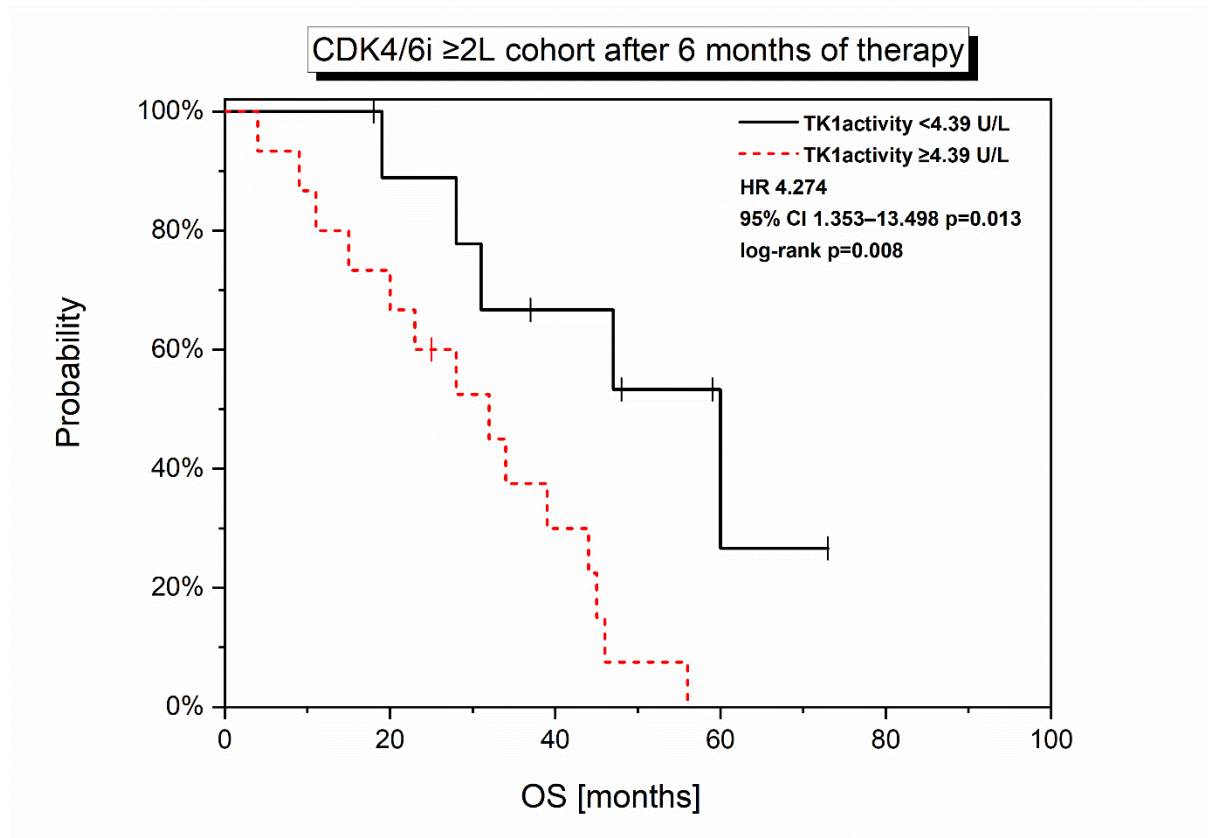

**Sup Figure 8: TK1 activity after six months of therapy in relation to OS in the CDK4/6i  $\geq 2L$  cohort.** High TK1 activity after six months of therapy (Cut-off: 4.39U/L) significantly correlated with OS in the CDK4/6i  $\geq 2L$  cohort in the log-rank analysis.

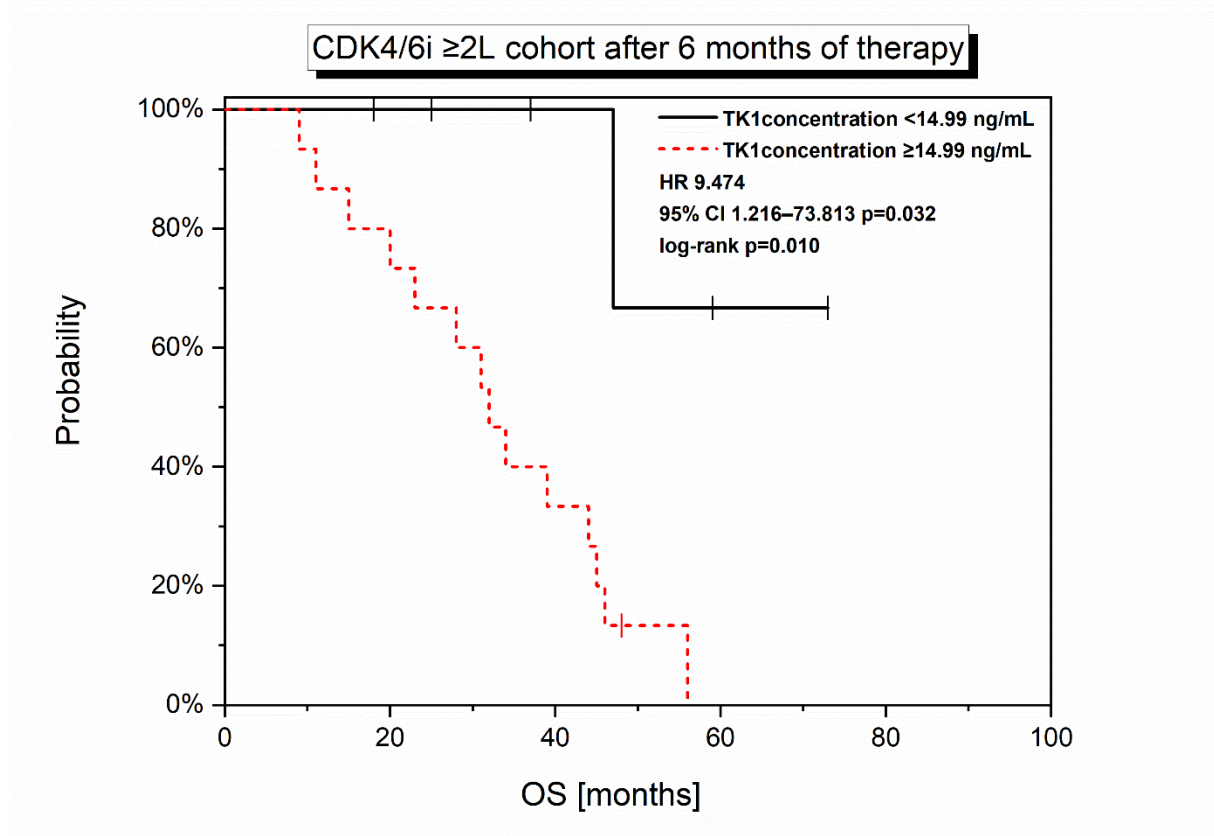

**Sup Figure 9: TK1 concentration after six months of therapy in relation to OS in the CDK4/6i  $\geq 2L$  cohort.** High TK1 concentration after six months of therapy (Cut-off: 14.99ng/mL) significantly correlated with OS in the CDK4/6i  $\geq 2L$  cohort in the log-rank analysis.

Supplementary Table 1: Correlations of TK1 concentration and activity dynamics from baseline to six months after therapy start versus PFS/OS.

| cohort      | correlation | difference between which time points | parameter         | cut-off | log-rank test | low                | high               | univariate Cox regression |        |                 | all mts, PR status | mts, prior endocrine TX, prior CTX, prior |              |
|-------------|-------------|--------------------------------------|-------------------|---------|---------------|--------------------|--------------------|---------------------------|--------|-----------------|--------------------|-------------------------------------------|--------------|
|             |             |                                      |                   |         | p-value       | number of subjects | number of subjects | p-value                   | HR     | 95% CI          | p-value            | HR                                        | 95% CI       |
| entire      | PFS         | baseline/after six months            | TK1 concentration | 0       | 0.005         | 21                 | 20                 | 0.008                     | 2.972  | 1.330 6.638     | 0.012              | 8.477                                     | 1.612 44.571 |
| entire      | PFS         | baseline/after six months            | TK1 activity      | 0       | 0.642         | 47                 | 20                 | 0.649                     | 1.164  | 0.605 2.242     |                    |                                           |              |
| entire      | OS          | baseline/after six months            | TK1 concentration | 0       | 0.001         | 21                 | 21                 | 0.003                     | 4.616  | 1.692 12.592    |                    |                                           |              |
| entire      | OS          | baseline/after six months            | TK1 activity      | 0       | 0.392         | 48                 | 21                 | 0.397                     | 1.350  | 0.674 2.703     |                    |                                           |              |
| control     | PFS         | baseline/after six months            | TK1 concentration | 0       | 0.160         | 3                  | 7                  | 0.198                     | 4.189  | 0.474 37.037    |                    |                                           |              |
| control     | PFS         | baseline/after six months            | TK1 activity      | 0       | 0.475         | 9                  | 2                  | 0.488                     | 0.465  | 0.053 4.053     |                    |                                           |              |
| control     | OS          | baseline/after six months            | TK1 concentration | 0       | 0.039         | 3                  | 7                  | 0.263                     | 49.387 | 0.054 45297.170 |                    |                                           |              |
| control     | OS          | baseline/after six months            | TK1 activity      | 0       | 0.157         | 9                  | 2                  | 0.396                     | 0.031  | 0.000 93.065    |                    |                                           |              |
| CDK4/6i     | PFS         | baseline/after six months            | TK1 concentration | 0       | 0.027         | 18                 | 13                 | 0.037                     | 2.659  | 1.061 6.666     | 0.046              | 8.570                                     | 1.039 70.701 |
| CDK4/6i     | PFS         | baseline/after six months            | TK1 activity      | 0       | 0.405         | 38                 | 18                 | 0.416                     | 1.340  | 0.662 2.710     |                    |                                           |              |
| CDK4/6i     | OS          | baseline/after six months            | TK1 concentration | 0       | 0.013         | 18                 | 14                 | 0.020                     | 3.540  | 1.221 10.262    |                    |                                           |              |
| CDK4/6i     | OS          | baseline/after six months            | TK1 activity      | 0       | 0.124         | 39                 | 19                 | 0.131                     | 1.758  | 0.845 3.658     |                    |                                           |              |
| CDK4/6i 1L  | PFS         | baseline/after six months            | TK1 concentration | 0       | 0.178         | 13                 | 5                  | 0.204                     | 2.347  | 0.629 8.766     |                    |                                           |              |
| CDK4/6i 1L  | PFS         | baseline/after six months            | TK1 activity      | 0       | 0.139         | 22                 | 11                 | 0.155                     | 2.091  | 0.757 5.776     |                    |                                           |              |
| CDK4/6i 1L  | OS          | baseline/after six months            | TK1 concentration | 0       | 0.634         | 13                 | 5                  | 0.637                     | 1.512  | 0.272 8.400     |                    |                                           |              |
| CDK4/6i 1L  | OS          | baseline/after six months            | TK1 activity      | 0       | 0.271         | 23                 | 11                 | 0.281                     | 1.885  | 0.595 5.968     |                    |                                           |              |
| CDK4/6i ≥2L | PFS         | baseline/after six months            | TK1 concentration | 0       | 0.316         | 5                  | 8                  | 0.346                     | 1.941  | 0.489 7.700     |                    |                                           |              |
| CDK4/6i ≥2L | PFS         | baseline/after six months            | TK1 activity      | 0       | 0.896         | 16                 | 7                  | 0.900                     | 0.936  | 0.336 2.610     |                    |                                           |              |
| CDK4/6i ≥2L | OS          | baseline/after six months            | TK1 concentration | 0       | 0.012         | 5                  | 9                  | 0.034                     | 9.763  | 1.189 80.197    |                    |                                           |              |
| CDK4/6i ≥2L | OS          | baseline/after six months            | TK1 activity      | 0       | 0.249         | 16                 | 8                  | 0.257                     | 1.758  | 0.663 4.662     |                    |                                           |              |

Supplementary Table 2: Correlations of TK1 concentration or activity at different timepoints in different cohorts regarding PFS or OS using a cohort-, timepoint- and endpoint-UNspecific Cut-off.

|             |                |                  |                   | cut-off (closest top left NOT cohort-specific (entire) and NOT timepoint-specific (baseline) and NOT endpoint-specific (PFS)) |               |               |               |              |         |                           |           |         |                                                                                                                                                               |        | Disconcordant significance with cohort-specific timepoint-specific (orange) versus cohort-unspecific timepoint-unspecific and endpoint-unspecific Cut-off |  |
|-------------|----------------|------------------|-------------------|-------------------------------------------------------------------------------------------------------------------------------|---------------|---------------|---------------|--------------|---------|---------------------------|-----------|---------|---------------------------------------------------------------------------------------------------------------------------------------------------------------|--------|-----------------------------------------------------------------------------------------------------------------------------------------------------------|--|
| cohort      | correlation to | timepoint        | parameter         |                                                                                                                               | log-rank test | low           | high          |              | p-value | univariate Cox regression |           |         | multivariate Cox regression (only to PFS with: visceral mts, PR status mts, prior endocrine TX, prior CTX, primaryvmsec met, more than one mts, age at start) |        |                                                                                                                                                           |  |
|             |                |                  |                   |                                                                                                                               |               |               |               |              |         |                           |           |         |                                                                                                                                                               |        |                                                                                                                                                           |  |
|             |                |                  |                   |                                                                                                                               | p-value       | number of sam | number of sam | p-value      | HR      | 95% CI                    |           | p-value | HR                                                                                                                                                            | 95% CI |                                                                                                                                                           |  |
| entire      | PFS            | baseline         | TK1 concentration | 17.53                                                                                                                         | 0.223         | 35            | 34            | 0.241        | 1.386   | 0.803                     | 2.393     |         |                                                                                                                                                               |        |                                                                                                                                                           |  |
| entire      | PFS            | baseline         | TK1 activity      | 9.87                                                                                                                          | 0.021         | 56            | 42            | 0.026        | 1.706   | 1.065                     | 2.736     | 0.038   | 1.952                                                                                                                                                         | 1.036  | 3.679                                                                                                                                                     |  |
| entire      | PFS            | after six months | TK1 concentration | 17.53                                                                                                                         | 0.863         | 44            | 18            | 0.865        | 0.941   | 0.468                     | 1.893     |         |                                                                                                                                                               |        |                                                                                                                                                           |  |
| entire      | PFS            | after six months | TK1 activity      | 9.87                                                                                                                          | 0.005         | 55            | 14            | 0.008        | 2.698   | 1.302                     | 5.588     | 0.036   | 2.372                                                                                                                                                         | 1.059  | 5.313                                                                                                                                                     |  |
| entire      | OS             | baseline         | TK1 concentration | 17.53                                                                                                                         | 0.377         | 38            | 35            | 0.383        | 0.765   | 0.419                     | 1.396     |         |                                                                                                                                                               |        |                                                                                                                                                           |  |
| entire      | OS             | baseline         | TK1 activity      | 9.87                                                                                                                          | 0.094         | 61            | 45            | 0.099        | 1.526   | 0.923                     | 2.521     |         |                                                                                                                                                               |        |                                                                                                                                                           |  |
| entire      | OS             | after six months | TK1 concentration | 17.53                                                                                                                         | 0.313         | 44            | 20            | 0.318        | 1.429   | 0.710                     | 2.877     |         |                                                                                                                                                               |        |                                                                                                                                                           |  |
| entire      | OS             | after six months | TK1 activity      | 9.87                                                                                                                          | 0.003         | 56            | 15            | 0.005        | 2.877   | 1.372                     | 6.032     |         |                                                                                                                                                               |        |                                                                                                                                                           |  |
| entire      | OS             | at progression   | TK1 concentration | 17.53                                                                                                                         | 0.338         | 10            | 32            | 0.344        | 1.498   | 0.648                     | 3.465     |         |                                                                                                                                                               |        |                                                                                                                                                           |  |
| entire      | OS             | at progression   | TK1 activity      | 9.87                                                                                                                          | 0.153         | 26            | 23            | 0.160        | 1.566   | 0.838                     | 2.928     |         |                                                                                                                                                               |        |                                                                                                                                                           |  |
| control     | PFS            | baseline         | TK1 concentration | 17.53                                                                                                                         | 0.061         | 12            | 3             | 0.100        | 0.172   | 0.021                     | 1.399     |         |                                                                                                                                                               |        |                                                                                                                                                           |  |
| control     | PFS            | baseline         | TK1 activity      | 9.87                                                                                                                          | 0.975         | 12            | 5             | 0.975        | 0.983   | 0.326                     | 2.966     |         |                                                                                                                                                               |        |                                                                                                                                                           |  |
| control     | PFS            | after six months | TK1 concentration | 17.53                                                                                                                         | 0.537         | 10            | 2             | 0.551        | 0.524   | 0.062                     | 4.395     |         |                                                                                                                                                               |        |                                                                                                                                                           |  |
| control     | PFS            | after six months | TK1 activity      | 9.87                                                                                                                          | 0.059         | 10            | 2             | 0.093        | 4.672   | 0.773                     | 28.251    |         |                                                                                                                                                               |        |                                                                                                                                                           |  |
| control     | OS             | baseline         | TK1 concentration | 17.53                                                                                                                         | 0.207         | 1             | 14            | 0.440        | 25.059  | 0.007                     | 889585.65 |         |                                                                                                                                                               |        |                                                                                                                                                           |  |
| control     | OS             | baseline         | TK1 activity      | 9.87                                                                                                                          | 0.788         | 12            | 5             | 0.793        | 1.176   | 0.351                     | 3.940     |         |                                                                                                                                                               |        |                                                                                                                                                           |  |
| control     | OS             | after six months | TK1 concentration | 17.53                                                                                                                         | 0.825         | 10            | 2             | 0.828        | 0.790   | 0.094                     | 6.618     |         |                                                                                                                                                               |        |                                                                                                                                                           |  |
| control     | OS             | after six months | TK1 activity      | 9.87                                                                                                                          | 0.971         | 10            | 2             | 0.971        | 1.040   | 0.121                     | 8.941     |         |                                                                                                                                                               |        |                                                                                                                                                           |  |
| control     | OS             | at progression   | TK1 concentration | 17.53                                                                                                                         | not possible  |               |               | not possible |         |                           |           |         |                                                                                                                                                               |        |                                                                                                                                                           |  |
| control     | OS             | at progression   | TK1 activity      | 9.87                                                                                                                          | not possible  |               |               | not possible |         |                           |           |         |                                                                                                                                                               |        |                                                                                                                                                           |  |
| CDK4/6i     | PFS            | baseline         | TK1 concentration | 17.53                                                                                                                         | 0.020         | 23            | 31            | 0.028        | 2.126   | 1.087                     | 4.159     | 0.013   | 3.358                                                                                                                                                         | 1.294  | 8.711                                                                                                                                                     |  |
| CDK4/6i     | PFS            | baseline         | TK1 activity      | 9.87                                                                                                                          | 0.012         | 44            | 37            | 0.016        | 1.917   | 1.129                     | 3.257     | 0.015   | 2.396                                                                                                                                                         | 1.185  | 4.848                                                                                                                                                     |  |
| CDK4/6i     | PFS            | after six months | TK1 concentration | 17.53                                                                                                                         | 0.816         | 34            | 16            | 0.819        | 1.093   | 0.511                     | 2.336     |         |                                                                                                                                                               |        |                                                                                                                                                           |  |
| CDK4/6i     | PFS            | after six months | TK1 activity      | 9.87                                                                                                                          | 0.022         | 45            | 12            | 0.029        | 2.460   | 1.094                     | 5.530     | 0.039   | 2.512                                                                                                                                                         | 1.047  | 6.029                                                                                                                                                     |  |
| CDK4/6i     | OS             | baseline         | TK1 concentration | 17.53                                                                                                                         | 0.687         | 26            | 32            | 0.689        | 1.151   | 0.579                     | 2.284     |         |                                                                                                                                                               |        |                                                                                                                                                           |  |
| CDK4/6i     | OS             | baseline         | TK1 activity      | 9.87                                                                                                                          | 0.078         | 49            | 40            | 0.084        | 1.637   | 0.936                     | 2.861     |         |                                                                                                                                                               |        |                                                                                                                                                           |  |
| CDK4/6i     | OS             | after six months | TK1 concentration | 17.53                                                                                                                         | 0.241         | 34            | 18            | 0.246        | 1.581   | 0.729                     | 3.427     |         |                                                                                                                                                               |        |                                                                                                                                                           |  |
| CDK4/6i     | OS             | after six months | TK1 activity      | 9.87                                                                                                                          | 0.001         | 46            | 13            | 0.002        | 3.517   | 1.579                     | 7.836     |         |                                                                                                                                                               |        |                                                                                                                                                           |  |
| CDK4/6i     | OS             | at progression   | TK1 concentration | 17.53                                                                                                                         | 0.216         | 8             | 28            | 0.225        | 1.829   | 0.689                     | 4.856     |         |                                                                                                                                                               |        |                                                                                                                                                           |  |
| CDK4/6i     | OS             | at progression   | TK1 activity      | 9.87                                                                                                                          | 0.063         | 20            | 19            | 0.070        | 1.965   | 0.947                     | 4.076     |         |                                                                                                                                                               |        |                                                                                                                                                           |  |
| CDK4/6i 1L  | PFS            | baseline         | TK1 concentration | 17.53                                                                                                                         | 0.007         | 12            | 19            | 0.017        | 4.519   | 1.308                     | 15.619    | 0.007   | 50.251                                                                                                                                                        | 2.898  | 871.329                                                                                                                                                   |  |
| CDK4/6i 1L  | PFS            | baseline         | TK1 activity      | 9.87                                                                                                                          | 0.266         | 30            | 19            | 0.281        | 1.513   | 0.713                     | 3.212     |         |                                                                                                                                                               |        |                                                                                                                                                           |  |
| CDK4/6i 1L  | PFS            | after six months | TK1 concentration | 17.53                                                                                                                         | 0.307         | 22            | 8             | 0.324        | 0.524   | 0.145                     | 1.892     |         |                                                                                                                                                               |        |                                                                                                                                                           |  |
| CDK4/6i 1L  | PFS            | after six months | TK1 activity      | 9.87                                                                                                                          | 0.273         | 27            | 6             | 0.290        | 1.995   | 0.555                     | 7.168     |         |                                                                                                                                                               |        |                                                                                                                                                           |  |
| CDK4/6i 1L  | OS             | baseline         | TK1 concentration | 17.53                                                                                                                         | 0.025         | 13            | 19            | 0.043        | 4.780   | 1.054                     | 21.678    |         |                                                                                                                                                               |        |                                                                                                                                                           |  |
| CDK4/6i 1L  | OS             | baseline         | TK1 activity      | 9.87                                                                                                                          | 0.396         | 33            | 21            | 0.400        | 1.427   | 0.623                     | 3.268     |         |                                                                                                                                                               |        |                                                                                                                                                           |  |
| CDK4/6i 1L  | OS             | after six months | TK1 concentration | 17.53                                                                                                                         | 0.712         | 22            | 9             | 0.714        | 0.780   | 0.206                     | 2.951     |         |                                                                                                                                                               |        |                                                                                                                                                           |  |
| CDK4/6i 1L  | OS             | after six months | TK1 activity      | 9.87                                                                                                                          | 0.384         | 28            | 6             | 0.394        | 1.961   | 0.417                     | 9.214     |         |                                                                                                                                                               |        |                                                                                                                                                           |  |
| CDK4/6i 1L  | OS             | at progression   | TK1 concentration | 17.53                                                                                                                         | 0.795         | 3             | 10            | 0.798        | 0.814   | 0.168                     | 3.946     |         |                                                                                                                                                               |        |                                                                                                                                                           |  |
| CDK4/6i 1L  | OS             | at progression   | TK1 activity      | 9.87                                                                                                                          | 0.085         | 8             | 7             | 0.101        | 2.966   | 0.808                     | 10.883    |         |                                                                                                                                                               |        |                                                                                                                                                           |  |
| CDK4/6i ≥2L | PFS            | baseline         | TK1 concentration | 17.53                                                                                                                         | 0.514         | 11            | 12            | 0.537        | 1.324   | 0.543                     | 3.225     |         |                                                                                                                                                               |        |                                                                                                                                                           |  |
| CDK4/6i ≥2L | PFS            | baseline         | TK1 activity      | 9.87                                                                                                                          | 0.036         | 14            | 18            | 0.050        | 2.163   | 0.999                     | 4.683     | 0.127   | 2.482                                                                                                                                                         | 0.772  | 7.981                                                                                                                                                     |  |
| CDK4/6i ≥2L | PFS            | after six months | TK1 concentration | 17.53                                                                                                                         | 0.160         | 12            | 8             | 0.187        | 1.992   | 0.715                     | 5.547     |         |                                                                                                                                                               |        |                                                                                                                                                           |  |
| CDK4/6i ≥2L | PFS            | after six months | TK1 activity      | 9.87                                                                                                                          | 0.022         | 18            | 6             | 0.038        | 3.417   | 1.072                     | 10.886    | 0.054   | 4.317                                                                                                                                                         | 0.975  | 19.123                                                                                                                                                    |  |
| CDK4/6i ≥2L | OS             | baseline         | TK1 concentration | 17.53                                                                                                                         | 0.043         | 14            | 12            | 0.051        | 0.380   | 0.144                     | 1.006     |         |                                                                                                                                                               |        |                                                                                                                                                           |  |
| CDK4/6i ≥2L | OS             | baseline         | TK1 activity      | 9.87                                                                                                                          | 0.195         | 16            | 19            | 0.203        | 1.646   | 0.765                     | 3.543     |         |                                                                                                                                                               |        |                                                                                                                                                           |  |
| CDK4/6i ≥2L | OS             | after six months | TK1 concentration | 17.53                                                                                                                         | 0.009         | 12            | 9             | 0.014        | 3.780   | 1.303                     | 10.967    |         |                                                                                                                                                               |        |                                                                                                                                                           |  |
| CDK4/6i ≥2L | OS             | after six months | TK1 activity      | 9.87                                                                                                                          | 0.007         | 18            | 7             | 0.011        | 3.510   | 1.327                     | 9.283     |         |                                                                                                                                                               |        |                                                                                                                                                           |  |
| CDK4/6i ≥2L | OS             | at progression   | TK1 concentration | 17.53                                                                                                                         | 0.110         | 5             | 18            | 0.125        | 2.672   | 0.760                     | 9.390     |         |                                                                                                                                                               |        |                                                                                                                                                           |  |
| CDK4/6i ≥2L | OS             | at progression   | TK1 activity      | 9.87                                                                                                                          | 0.135         | 11            | 13            | 0.145        | 1.976   | 0.791                     | 4.934     |         |                                                                                                                                                               |        |                                                                                                                                                           |  |

Supplementary Table 3: Cohort-, timepoint-, parameter-, and endpoint-specific Cut-offs used for the results presented in the main text identified by closest top left approach.

|              | closest top left  |              |                   |              |                   |              |                   |              |                   |              |
|--------------|-------------------|--------------|-------------------|--------------|-------------------|--------------|-------------------|--------------|-------------------|--------------|
|              | PFS               |              |                   |              | OS                |              |                   |              |                   |              |
|              | baseline          |              | after six months  |              | baseline          |              | after six months  |              | PD                |              |
|              | sTK concentration | sTK activity | sTK concentration | sTK activity | sTK concentration | sTK activity | sTK concentration | sTK activity | sTK concentration | sTK activity |
| entire       | 17,53             | 9,87         | 15,13             | 4,94         | 25,23             | 10,70        | 15,13             | 4,94         | 21,91             | 6,07         |
| CDK4/6i      | 17,53             | 11,05        | 14,94             | 4,03         | 17,81             | 10,70        | 14,99             | 4,27         | 21,91             | 6,09         |
| control      | 7,38              | 9,40         | 16,42             | 8,57         | 7,38              | 4,86         | 15,29             | 8,57         | 21,91             | 6,09         |
| CDK4/6i 1L   | 17,57             | 6,61         | 14,56             | 4,03         | 17,81             | 6,61         | 14,68             | 3,29         | 25,85             | 7,15         |
| CDK4/6i >=2L | 20,95             | 7,83         | 15,95             | 3,62         | 23,68             | 7,11         | 14,99             | 4,39         | 22,73             | 4,71         |

# Supplementary File 1: Evaluation of the robustness of the TK1 concentration analysis method

## Detection range

Before starting the analysis of all plasma samples within the study cohort regarding TK1 concentration, we first evaluated the TK1 concentration in 15 plasma samples of 10 metastatic breast cancer patients that were not included in the CDK4/6i or control cohort (of 5 patients samples at a stable disease time point and matched samples at a progressive disease time point) to identify the range in TK1 concentration. This small group of samples showed a range in TK1 concentration from 5.0ng/ml to 21.4ng/ml and thus, a TK1 concentration analysis method was chosen with a detection range of 2.5ng/ml to 50ng/ml (see method section).

## Intra-assay variance

Evaluation of the chosen method for TK1 concentration analysis utilizing 15 plasma samples of 10 metastatic breast cancer patients that were not included in the CDK4/6i or control cohort showed an mean intra-assay variance of the matched triplicates in the undiluted plasma samples of CV 8.3% (range 2.9% -14.8%, Figure 1). The five plasma samples analyzed in a 1:5 or 1:10 dilution showed a mean intra-assay variance between the triplicates of 15.6% (1:5) and 17.9% (1:10) (Figure 1). Based on these results an exclusion criterion was chosen: Only samples with an CV <20% between the triplicates were included in the data analysis.

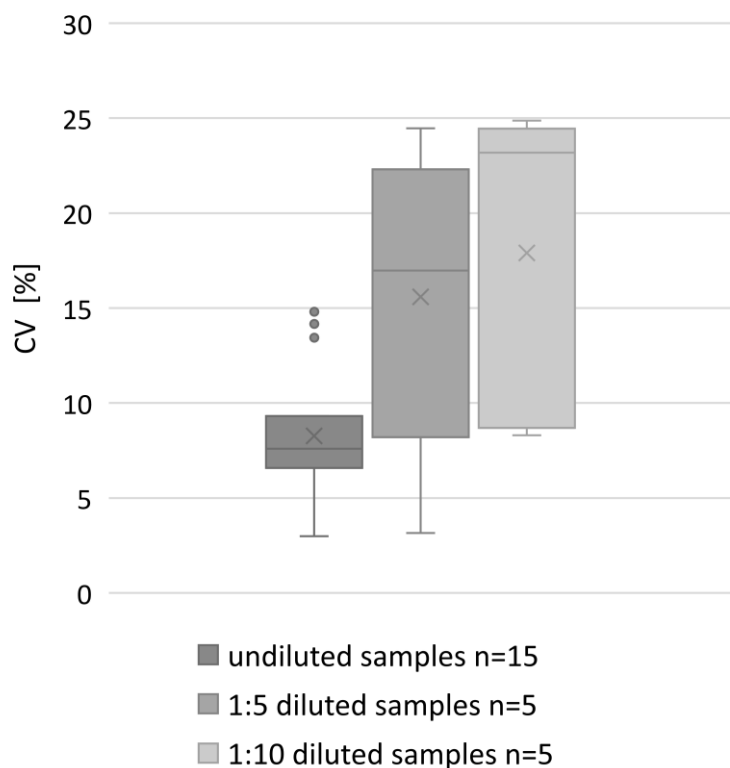

**Figure 1: Intra-assay variance of triplicates.** Boxplots (box: 25th to the 75th percentile, line: median, cross: mean, whisker: minimum and maximum values – despite outliers, dots: outlier (1.5x interquartile range)) show the intra-assay variance (in coefficient of variance in %) within triplicates in undiluted, 1:5 and 1:10 diluted samples.



## Dilution effect

As the detection range of the utilized TK1 concentration analysis method was limited to 50ng/ml, we wondered whether the dilution of plasma samples showing TK1 concentration values above 50ng/ml in undiluted samples might be suitable. Comparison of the TK1 concentration values in matched undiluted, 1:5 or 1:10 diluted samples (n=5) showed an increase in measured TK1 concentration not linear to the dilution factor (Figure 2). The mean coefficient of variance between the matched samples (n=5) measured in different dilutions (n=3) was 67.7%. We concluded not to utilize the TK1 concentration evaluation in diluted samples. Consequently, the highest detectable TK1 concentration was 50ng/ml and samples with higher TK1 concentrations were not evaluable.

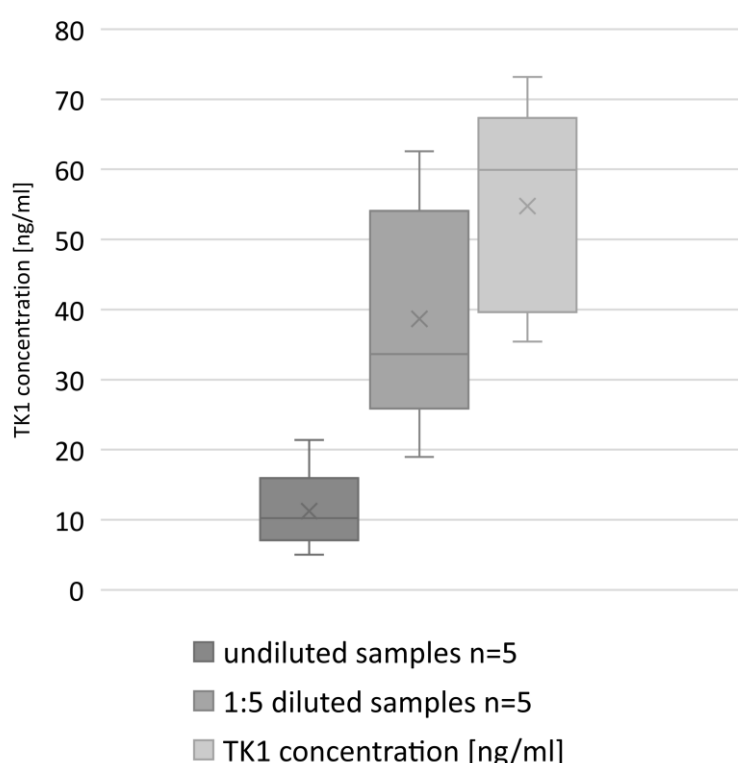

**Figure 2: Dilution effect.** The same five plasma samples were measured undiluted, 1:5 and 1:10 diluted and the dilution factor was included in the TK1 concentration calculation. Boxplots (box: 25th to the 75th percentile, line: median, cross: mean, whisker: minimum and maximum values – despite outliers, dots: outlier (1.5x interquartile range)) show the increase in measured TK1 concentration (dilution factor included) with increased dilution.

## Measurement of the same samples (Inter-assay variance)

Some samples were measured twice as they were initially listed within the group of samples drawn after six months (later excluded from this sample group) and the group of samples at the progressive disease time point, if the patients showed a PFS of six months. We retrospectively use these samples (n=10) to identify the inter-assay variance. The mean CV for the TK1 concentration was 22% with a range of 5%-86% (Figure 3). In contrast, the inter-assay variance of the TK1 activity measurement of the same samples (n=14) at two different time points showed a mean CV of only 7% (Figure 3). 20% (2/10) cases for the TK1

concentration measurement, but only 7% (1/14) cases for the TK1 activity measurement showed a non-optimal CV >20%. We conclude that the inter-assay variance of the TK1 concentration analysis is not optimal and the TK1 concentration analysis method shows limited robustness.

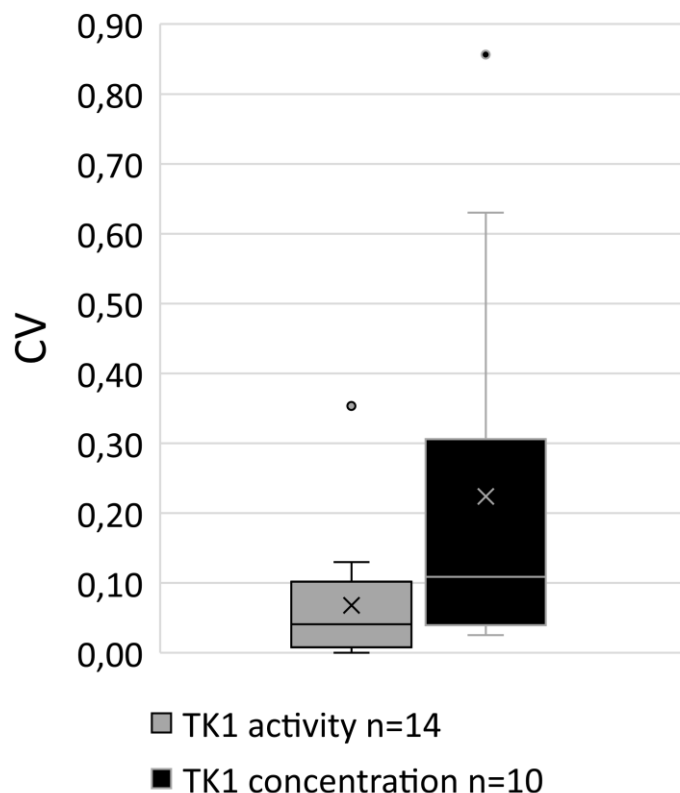

**Figure 3: Inter-assay variance.** The same plasma samples were measured twice for their TK1 concentration (black) and TK1 activity (grey). Boxplots (box: 25th to the 75th percentile, line: median, cross: mean, whisker: minimum and maximum values – despite outliers, dots: outlier (1.5x interquartile range)) show the high coefficient of variation for the TK1 concentration measurements, in contrast to the TK1 activity measurements.

### Repeated/additional measurements of the same samples (Inter-assay variance)

Since we excluded the TK1 concentration measurements with CV>20% in the triplicates, the measurement of these samples was repeated by an additional measurement after having analyzed all plasma samples of all patients and at all time points once. Some of the additional measurements were conducted with diluted samples. Despite using the same reagent LOT and same protocol, we saw striking differences in the TK1 concentrations of the first and the additional measurement in matched samples (n=37, Figure 4) with mostly higher TK1 concentration values in the additional measurements (mostly diluted samples). 36/37 cases showed a CV >20% with a mean CV of 70%. This phenomenon might in part be explained by the dilution effect identified in the small group of samples, discussed in this supplementary file earlier. We concluded to exclude all TK1 concentration values that were based not on the first, but on the additional measurement.

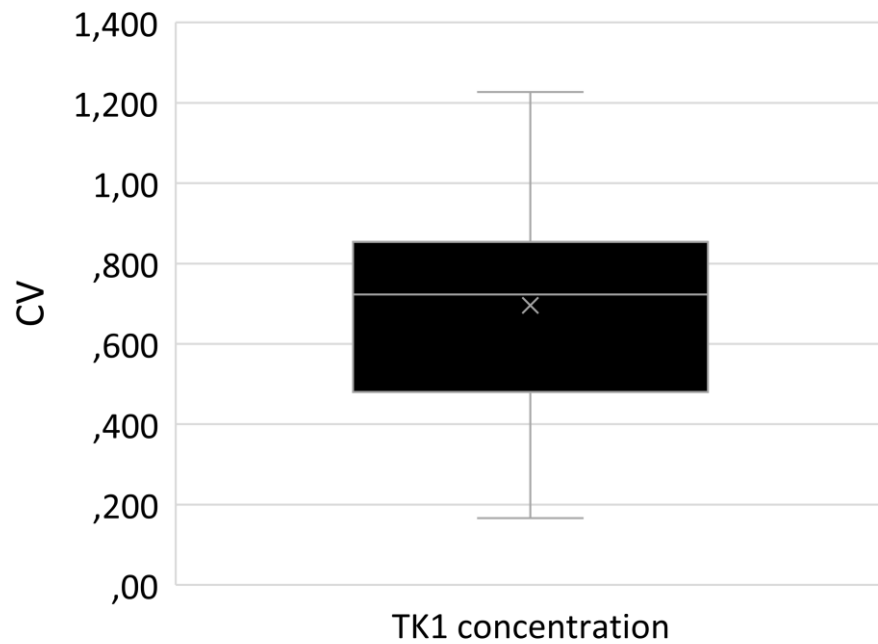

**Figure 4: Inter-assay variance by additional measurements of the same samples.** The same plasma samples (n=37) were measured again (in dilution) for their TK1 concentration. Boxplot (box: 25th to the 75th percentile, line: median, cross: mean, whisker: minimum and maximum values – despite outliers, dots: outlier (1.5x interquartile range)) shows the high coefficient of variation between the first and the additional measurement leading to the exclusion of the data from the additional measurement.
